# Supplementary material for: Selectived and Reshaped Early Dominant Microbial Community in the Cecum With Similar Proportions and Better Homogenization and Species Diversity Due to Organic Acids as AGP Alternatives Mediate Their Effects on Broilers Growth
Source: Front Microbiol. 2020 Jan 14;10:2948. doi: 10.3389/fmicb.2019.02948 (PMC6971172; doi:10.3389/fmicb.2019.02948)
Supplement: Supplementary file 5 [file Table_5.docx]

Table S5. Effects of Virginiamycin and organic acids supplementation on the relative abundance (%) of the predominant microbiota (top 15) at the family level in the cecal digesta of broilers at the age of 42 days in this experiment.

| Taxonomy | |  | Groups 1 | | | | | SEM | *P* value |
| --- | --- | --- | --- | --- | --- | --- | --- | --- | --- |
| Phyla classification | Family classification |  | NC | PC | DOA | WOA | MOA |
| Firmicutes | Ruminococcaceae | | 9.43 a | 9.16 a | 8.91 a | 11.55 a | 8.21 a | 0.55 | 0.403 | |
| Lactobacillaceae | | 4.93 a | 8.61 a | 8.49 a | 4.43 a | 2.81 a | 0.95 | 0.964 | |
| Lachnospiraceae | | 6.42 a | 7.55 a | 6.43 a | 7.93 a | 7.47 a | 0.76 | 0.202 | |
| Clostridiales_vadinBB60_group | | 0.89 a | 1.06 a | 0.98 a | 1.46 a | 1.21 a | 0.14 | 0.761 | |
| Streptococcaceae | | 0.700 ab | 0.015b | 0.910 a | 0.725 ab | 0.148 b | 0.041 | 0.194 | |
| Erysipelotrichaceae | | 1.49 a | 1.17 a | 1.44 a | 1.87 a | 3.50 a | 0.45 | 0.510 | |
| Peptostreptococcaceae | | 0.58 a | 0.54 a | 0.71 a | 0.84 a | 0.80 a | 0.10 | 0.892 | |
| Christensenellaceae | | 0.244 b | 0.338 ab | 0.431 ab | 0.631 a | 0.583 a | 0.053 | 0.094 | |
| Peptococcaceae | | 0.078 a | 0.070 a | 0.068 a | 0.129 a | 0.100 a | 0.012 | 0.453 | |
| Enterococcaceae | | 0.077 ab | 0.121 a | 0.041 b | 0.023 b | 0.013 b | 0.013 | 0.054 | |
| Family_XIII | | 0.1104 a | 0.0992 a | 0.1018 a | 0.1490 a | 0.1215 a | 0.0084 | 0.334 | |
| Proteobacteria | Enterobacteriaceae | | 8.25 a | 1.46 b | 1.54 b | 0.57 b | 0.64 b | 0.88 | 0.016 | |
| Bacteroidetes | Porphyromonadaceae | | 63.87 a | 63.38 a | 65.32 a | 66.72 a | 71.97 a | 2.02 | 0.704 | |
| Rikenellaceae | | 0.23 a | 4.34 a | 0.27 a | 0.58 a | 0.02 a | 0.85 | 0.476 | |
| Verrucomicrobia | Verrucomicrobiaceae | | 0.142 a | 0 a | 0.008 a | 0 a | 0.195 a | 0.043 | 0.464 | |
| Others | | | 0.0256 a | 0.0209 a | 0.0435 a | 0.0239 a | 0.0221 a | 0.0016 | 0.434 | |

Notes: Superscript 1: NC = negative control, basal diet and basal drinking water with no antibiotic supplementation; PC = positive control, antibiotics supplementation; DOA = NC plus diet-administered OA supplementation; WOA = NC plus water-administered OA supplementation; MOA = NC plus diet-administered and water-administered OA supplementation. Values are expressed as means with pooled SEM values. *P* value is expressed combined significance. In the same line, values with different letters are significantly different for all possible combinations of these different groups (*P* < 0.05 or *P* < 0.01), n = 8.
