# Supplementary material for: Selectived and Reshaped Early Dominant Microbial Community in the Cecum With Similar Proportions and Better Homogenization and Species Diversity Due to Organic Acids as AGP Alternatives Mediate Their Effects on Broilers Growth
Source: Front Microbiol. 2020 Jan 14;10:2948. doi: 10.3389/fmicb.2019.02948 (PMC6971172; doi:10.3389/fmicb.2019.02948)
Supplement: Supplementary file 8 [file Table_8.docx]

Table S8. Effects of Virginiamycin and organic acids supplementation on the relative abundance (%) of the predominant microbiota at the species classification in the cecal digesta of broilers at the age of 21 days.

| Taxonomy | | | | Groups 1 | | | | | SEM | *P* value |
| --- | --- | --- | --- | --- | --- | --- | --- | --- | --- | --- |
| Phyla classification | Family classification | Genus classification | Species classification | NC | PC | DOA | WOA | MOA |
| Bacteroidetes | Bacteroidaceae | Bacteroides | Bacteroides_dorei | 0.0005 a | 0.0011 a | 0 a | 0.0049 b*# | 0 a | 0.0006 | 0.036 |
| Bacteroides_coprocola | 0 a | 0 a | 0 a | 0.00054 b*# | 0 a | 0.00011 | 0.426 |
| Bacteroides_coprophilus | 0 a | 0 a | 0 a | 0.00108 b*# | 0 a | 0.00015 | 0.068 |
| Bacteroides_fragilis | 0.0003 a | 0.0014 a | 0.0008 a | 0.0019 a | 0.0011 a | 0.0005 | 0.862 |
| Bacteroides_intestinalis | 0 a | 0 a | 0.00027 ab | 0.00108 b*# | 0 a | 0.00018 | 0.224 |
| Bacteroides_plebeius | 0.0005 ab | 0 a | 0 a | 0.0030 b# | 0 a | 0.0004 | 0.130 |
| Chitinophagaceae | Chitinophaga | bacterium_CYSHGTNA05-1 | 0.00054 a | 0 a | 0.00054 a | 0 a | 0 a | 0.00015 | 0.567 |
| Porphyromonadaceae | Barnesiella | Barnesiella_viscericola | 0 a | 0 a | 0.00027 a | 0.00027 a | 0 a | 0.00008 | 0.567 |
| Parabacteroides | Parabacteroides_distasonis | 0 a | 0 a | 0 a | 0.00081 a | 0 a | 0.00016 | 0.426 |
| Parabacteroides_merdae | 0.00054 a | 0 a | 0 a | 0.00081 a | 0 a | 0.00014 | 0.177 |
| Rikenellaceae | Alistipes | Faecalibacterium_prausnitzii | 0 a | 0 a | 0 a | 0.00027 b*# | 0 a | 0.00005 | 0.426 |
| Firmicutes | Aerococcaceae | Aerococcus | Aerococcus_viridans | 0.00081 a | 0 a | 0 a | 0.00108 a | 0 a | 0.00027 | 0.561 |
| Christensenellaceae | Christensenellaceae_R-7_group | bacterium_YE57 | 0.0076 a | 0.0022 a | 0.0027 a | 0.0051 a | 0.0019 a | 0.0011 | 0.418 |
| Clostridiaceae_1 | Clostridium_sensu_stricto_1 | Clostridium_butyricum | 0 a | 0 a | 0 a | 0.00189 b*# | 0.00081 ab | 0.00026 | 0.075 |
| Clostridium_perfringens | 0.0068 a | 0 a | 0.0024 a | 0.0014 a | 0 a | 0.0012 | 0.339 |
| Enterococcaceae | Anaerofustis | Anaerofustis_stercorihominis | 0 a | 0.0019 ab | 0.0046 a | 0.0176 b*# | 0.0003 a | 0.0023 | 0.080 |
| Enterococcus | Enterococcus_durans | 0.14 a | 0.42 a | 0.19 a | 0.13 a | 0.47 a | 0.06 | 0.206 |
| Erysipelotrichaceae | Erysipelatoclostridium | bacterium_ic1391 | 0.43 a | 0.95 a | 1.01 a | 0.70 a | 0.45 a | 0.15 | 0.634 |
| [Clostridium]_spiroforme | 1.06 b | 0.42 ab | 0.35 a# | 0.50 ab | 0.49 ab | 0.11 | 0.223 |
| unidentified_Erysipelotrichaceae | Clostridiales_bacterium_60-7e | 0.11 a | 0.23 a | 0.20 a | 0.26 a | 0.36 a | 0.05 | 0.567 |
| Clostridiales_bacterium_10-3b | 0.044 a | 0.075 a | 0.048 a | 0.101 ab | 0.183 b*# | 0.018 | 0.080 |
| Lachnospiraceae | Anaerosporobacter | Clostridiales_bacterium_77-5d | 0 a | 0.00108 a | 0.00081 a | 0.00054 a | 0.00027 a | 0.00025 | 0.702 |
| Anaerostipes | Anaerostipes_butyraticus | 0.12 a | 0.43 b* | 0.06 a ## | 0.16 ab | 0.20 ab | 0.05 | 0.116 |
| Blautia | Blautia_glucerasea | 0.4 a | 0.5 a | 2.6 b *# | 0.2 a | 0.3 a | 0.3 | 0.051 |
| Coprococcus_1 | intestinal_bacterium_CG19-1 | 0.0014 a | 0.0005 a | 0.0022 a | 0 a | 0 a | 0.0005 | 0.559 |
| Dorea | Dorea_longicatena | 0 a | 0 a | 0.00027 ab | 0.00135 b *# | 0 a | 0.00020 | 0.121 |
| Lachnoclostridium | Clostridium_sp._BR31 | 0.22 a | 0.15 a | 0.27 a | 0.28 a | 0.32 a | 0.03 | 0.492 |
| [Ruminococcus]_gauvreauii_group | bacterium_ic1294 | 0.032 ab | 0.038 ab | 0.052 b | 0.009 a | 0.052 b | 0.007 | 0.345 |
| bacterium_ic1296 | 0.292 b | 0.092 a* | 0.218 ab | 0.232 ab | 0.267 b# | 0.028 | 0.171 |
| Sellimonas | bacterium_P1C11 | 0.33 b | 0.10 a* | 0.15 ab | 0.25 ab | 0.26 ab | 0.03 | 0.131 |
| Lactobacillaceae | Lactobacillus | Lactobacillus_agilis | 2.7 ab | 0.2 a | 8.3 c *## | 0.3 a | 2.6 b | 1.0 | 0.048 |
| Lactobacillus_crustorum | 0.0016 ab | 0.0022 ab | 0.0095 b | 0 a | 0 a | 0.0019 | 0.497 |
| Lactobacillus_equicursoris | 0.070 b | 0 a* | 0 a* | 0 a* | 0.002 a* | 0.012 | 0.215 |
| Lactobacillus_gasseri | 1.33 a | 12.32 b ** | 0.60 a ## | 0.17 a ## | 0.42 a ## | 1.28 | 0.003 |
| Lactobacillus_mucosae | 0 a | 0.00054 b* | 0 a # | 0 a # | 0 a # | 0.00011 | 0.426 |
| Lactobacillus_pontis | 0.0030 a | 0.0035 a | 0.0043 ab | 0.0032 a | 0.0081 b* | 0.0009 | 0.367 |
| Lactobacillus_salivarius | 10.29 b | 5.14 ab | 3.94 a * | 1.99 a * | 5.11 ab | 1.21 | 0.283 |
| Peptococcaceae | Desulfotomaculum | Desulfotomaculum_ruminis | 0.00081 a | 0 a | 0.00081 a | 0 a | 0 a | 0.00023 | 0.567 |
| Ruminococcaceae | Butyricicoccus | Butyricicoccus_pullicaecorum | 0 a | 0 a | 0.00135 b *# | 0 a | 0.00054 ab | 0.00022 | 0.195 |
| Candidatus_Soleaferrea | Ruminococcaceae_bacterium_GD6 | 0.0003 a | 0.0008 a | 0.0005 a | 0.0008 a | 0.0011 a | 0.0003 | 0.948 |
| Faecalibacterium | bacterium_ic1379 | 0.008 a | 0.040 a | 0.009 a | 0.102 b *# | 0.004 a | 0.011 | 0.020 |
| Ruminiclostridium_5 | [Clostridium]_leptum | 0.00162 b | 0.00054 ab | 0 a * | 0 a * | 0.00027 a * | 0.00021 | 0.065 |
| Ruminococcaceae_UCG-014 | [Clostridium]_papyrosolvens | 0.01 a | 0.20 b * | 0.01 a # | 0.06 ab | 0.01 a # | 0.04 | 0.493 |
| unidentified_Ruminococcaceae | Ruminococcaceae_bacterium_668 | 0.0035 a | 0 a | 0.0054 a | 0.0062 a | 0.0049 a | 0.0013 | 0.632 |
| Ruminococcaceae_bacterium_AM2 | 0.198 b | 0.016 a ** | 0.080 ab | 0.042 a * | 0.058 a * | 0.021 | 0.057 |
| Ruminococcus_sp._16442 | 0.044 b | 0.019 a * | 0.011 a ** | 0.027 ab | 0.021 a * | 0.004 | 0.038 |
| Streptococcaceae | Streptococcus | Streptococcus_gallolyticus_subsp._macedonicus | 2.5 c | 0 a * | 1.6 bc | 0.1 ab * | 0 ab * | 0.4 | 0.112 |
| Streptococcus_pluranimalium | 0.00108 b | 0.00054 ab | 0.00027 ab | 0 a * | 0 a * | 0.00019 | 0.324 |
| Lactococcus | Lactococcus_garvieae | 0.0076 b | 0 a * | 0.0016 ab | 0.0005 a * | 0 a * | 0.0011 | 0.134 |
| Veillonellaceae | Megasphaera | Megasphaera_elsdenii | 0.00162 b | 0.00054 ab | 0 a * | 0.00027 ab | 0 a * | 0.00025 | 0.206 |
| Veillonella | Veillonella_ratti | 0 a | 0 a | 0 a | 0.00135 b *# | 0 a | 0.00027 | 0.426 |
| Proteobacteria | Burkholderiaceae | Burkholderia-Paraburkholderia | Burkholderia_sp._CCGE1003 | 0.0030 a | 0.0014 a | 0.0100 b **## | 0.0003 a | 0.0003 a | 0.0010 | 0.005 |
| Burkholderia_symbiont_of_Cavelerius_saccharivorus | 0.00081 b | 0.00027 a * | 0.00217 c *# | 0 ab | 0 ab | 0.00027 | 0.037 |
| Comamonadaceae | Delftia | Delftia_tsuruhatensis | 0.00081 a | 0.00108 a | 0.00054 a | 0.00081 a | 0.00108 a | 0.00027 | 0.971 |
| Enterobacteriaceae | Escherichia-Shigella | Escherichia_coli | 2.8 a | 6.5 b * | 5.0 b * | 0.9 a ## | 0.7 a ## | 0.7 | 0.007 |
| Proteus | Proteus_mirabilis | 0 a | 0.003 a | 0.011 a | 0.012 a | 0 a | 0.003 | 0.636 |
| Orbaceae | Gilliamella | Serratia_symbiotica | 0 a | 0 a | 0 a | 0.00027 b *# | 0 a | 0.00005 | 0.426 |
| Moraxellaceae | Psychrobacter | Psychrobacter_meningitidis | 0 a | 0 a | 0.00081 b *# | 0 a | 0 a | 0.00016 | 0.426 |
| Xanthomonadaceae | Stenotrophomonas | [Pseudomonas]_geniculata | 0.00054 a | 0 a | 0 a | 0.00027 a | 0.00054 a | 0.00014 | 0.563 |
| Acidobacteria | Acidobacteriaceae_(Subgroup_1) | unidentified_Acidobacteriac | bacterium_Ellin326 | 0 a | 0 a | 0.00162 b *# | 0.00027 a | 0.00054 a | 0.00022 | 0.108 |
| Coriobacteriaceae | Gordonibacter | Gordonibacter_urolithinfaciens | 0.008 a | 0.052 a | 0.005 a | 0.011 a | 0.045 a | 0.009 | 0.325 |
| Gordonibacter_pamelaeae | 0.006 a | 0.022 ab | 0.007 a | 0.030 b * | 0.025 ab | 0.004 | 0.140 |
| unidentified_Acidimicrobiales | unidentified_Acidimicrobiales | actinobacterium_YJF2-33 | 0 a | 0 a | 0.00027 b *# | 0 a | 0 a | 0.00005 | 0.426 |
| unidentified_Subgroup_2 | unidentified_Subgroup_2 | bacterium_Ellin7505 | 0.00162 b | 0.00054 ab | 0.00027 ab | 0 a * | 0 a * | 0.00026 | 0.256 |
| Verrucomicrobia | Verrucomicrobiaceae | Akkermansia | Akkermansia_muciniphila | 0.0003 a | 0 a | 0 a | 0.0041 b *# | 0.0016 ab | 0.0005 | 0.073 |
| unidentified_OPB35_soil_group | unidentified_OPB35_soil_group | bacterium_Ellin5102 | 0.00054 ab | 0 a | 0.00081 b # | 0 a | 0.00054 ab | 0.00017 | 0.469 |
| bacterium_Ellin516 | 0.00027 b | 0 a * | 0 a * | 0 a * | 0 a * | 0.00005 | 0.426 |
| Others | | | | 76.9 ab | 72.1 a | 75.2 a | 93.4 c **## | 87.6 b ## | 2.2 | 0.002 |

Notes: Superscript 1: NC = negative control, basal diet and basal drinking water with no antibiotic supplementation; PC = positive control, antibiotics supplementation; DOA = NC plus diet-administered OA supplementation; WOA = NC plus water-administered OA supplementation; MOA = NC plus diet-administered and water-administered OA supplementation. Values are expressed as means with pooled SEM values. P value is expressed combined significance. In the same line, values with different letters are significantly different for all possible combinations of these different groups (*P* < 0.05 or *P* < 0.01), n = 8. In the same line, superscript * indicates significant difference between PC, DOA, WOA or MOA group and NC group at the level of 0.05, and superscript ** indicates significantly different between PC, DOA, WOA or MOA group and NC group at the level of 0.01; superscript # indicates significant difference between DOA, WOA or MOA group and NC group at the level of 0.05, and superscript ## indicates significantly different between DOA, WOA or MOA group and NC group at the level of 0.01.
